# Supplementary material for: Effects of Resistance Exercise on Neuroprotective Factors in Middle and Late Life: A Systematic Review and Meta-Analysis
Source: PubMed Central journal article supplement (PMC10389831; doi:10.14336/ad.2022.1207), 2023-08-01
Supplement: AD-14-4-1264-s.pdf [file AD-14-4-1264-s.pdf]

SUPPLEMENTARY DATA

# **Effects of Resistance Exercise on Neuroprotective Factors in Middle and Late Life: A Systematic Review and Meta-Analysis**

**Eva Rodríguez-Gutiérrez, Ana Torres-Costoso, Carlos Pascual-Morena, Diana P Pozuelo-Carrascosa, Miriam Garrido-Miguel, Vicente Martínez-Vizcaíno**

# SUPPLEMENTARY DATA

**Supplementary Table 1.** Database search strategy.

| Database       | Search strategy                                                                                                                                                                                                                                                                                                                                 |
|----------------|-------------------------------------------------------------------------------------------------------------------------------------------------------------------------------------------------------------------------------------------------------------------------------------------------------------------------------------------------|
| CINAHL         |                                                                                                                                                                                                                                                                                                                                                 |
| Cochrane       |                                                                                                                                                                                                                                                                                                                                                 |
| MEDLINE        | ("strength exercise" OR "resistance exercise" OR "strength training" OR "resistance training" OR "weight training" OR "weight lifting") AND (IGF-1 OR "insulin-like growth factor 1" OR BDNF OR "brain-derived neurotrophic factor" OR VEGF OR "vascular endothelial growth factor") AND (random* control* trials) NOT (animal OR rat OR mouse) |
| SPORTDiscus    |                                                                                                                                                                                                                                                                                                                                                 |
| Scopus         |                                                                                                                                                                                                                                                                                                                                                 |
| Web of Science |                                                                                                                                                                                                                                                                                                                                                 |
| PEDro          | strength training IGF-1 randomized clinical trial<br>resistance training IGF-1 randomized clinical trial<br>strength training BDNF randomized clinical trial<br>resistance training BDNF randomized clinical trial<br>strength training VEGF randomized clinical trial<br>resistance training VEGF randomized clinical trial                    |

Abbreviations: BDNF = brain-derived neurotrophic factor, IGF-1 = insulin-like growth factor type 1, VEGF = vascular endothelial growth factor

**Supplementary Table 2.** Subgroup analysis of the effect of resistance exercise on IGF-1 by sex.

| Subgroup | n  | SMD (95% CI)      | I <sup>2</sup> | p     |
|----------|----|-------------------|----------------|-------|
| Man      | 5  | 0.77 (0.48, 1.06) | 0.0%           | 0.599 |
| Woman    | 16 | 0.49 (0.18, 0.79) | 61.6%          | 0.001 |

Abbreviations: CI = confidence interval, SMD = standardized mean differences, IGF-1 = insulin-like growth factor type 1

**Supplementary Table 3.** Meta-regression analysis of the effect of resistance exercise versus control group on IGF-1 levels.

|              | n  | Age $\beta$ (95% CI)      | p     | n  | BMI $\beta$ (95% CI)      | p     |
|--------------|----|---------------------------|-------|----|---------------------------|-------|
| <b>IGF-1</b> | 24 | -0.288<br>(-0.866, 0.291) | 0.313 | 24 | -0.011<br>(-0.054, 0.033) | 0.619 |

BMI Body mass index, IGF-1 Insulin-like growth factor type 1

# SUPPLEMENTARY DATA

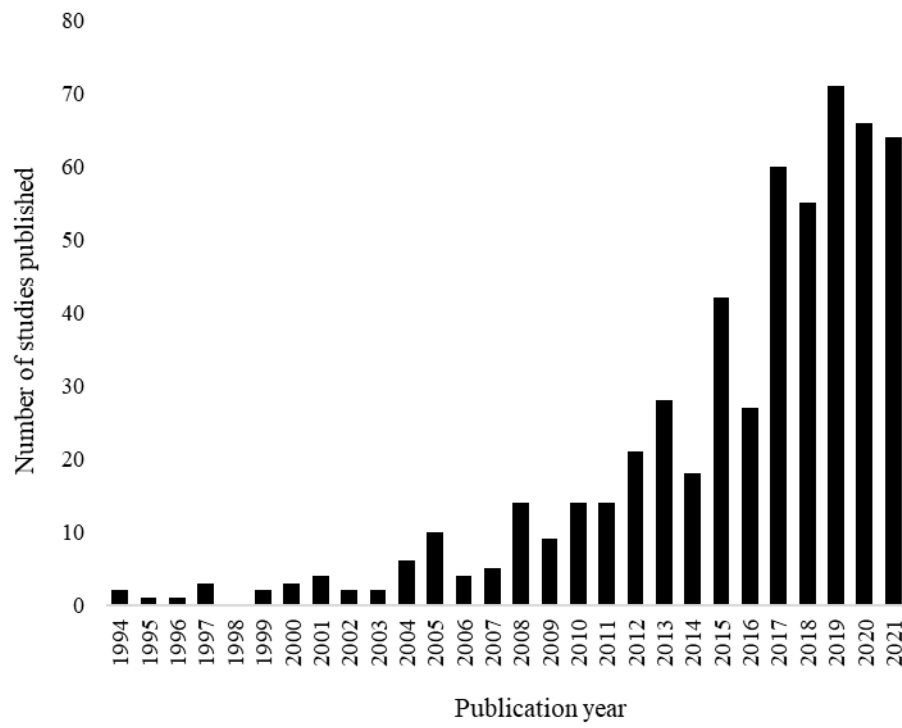

**Supplementary Figure 1.** Number of studies published per year.

# SUPPLEMENTARY DATA

|                           | Randomization process | Deviations from intended interventions | Missing outcome data | Measurement of the outcome | Selection of the reported result | Overall Bias |   |
|---------------------------|-----------------------|----------------------------------------|----------------------|----------------------------|----------------------------------|--------------|---|
| Arazi et al, 2020         | +                     | ?                                      | +                    | +                          | ?                                | !            | + |
| Bermon et al, 1999        | ?                     | ?                                      | +                    | +                          | ?                                | !            | ? |
| Bagheri et al, 2021       | ?                     | +                                      | +                    | +                          | ?                                | !            | + |
| Benitalebi et al, 2020    | +                     | +                                      | +                    | +                          | ?                                | !            | ? |
| Casshilas et al, 2010     | ?                     | ?                                      | +                    | +                          | ?                                | !            | + |
| Casshilas et al, 2007     | ?                     | ?                                      | +                    | ?                          | ?                                | !            | ? |
| Chen et al, 2017          | ?                     | ⊖                                      | ?                    | +                          | ?                                | ⊖            | ⊖ |
| Chen et al, 2019          | +                     | ?                                      | +                    | ?                          | ?                                | !            | + |
| Coelho-Junior et al, 2020 | +                     | ⊖                                      | +                    | +                          | +                                | ⊖            | ⊖ |
| Copeland et al, 2014      | ?                     | +                                      | +                    | +                          | ?                                | !            | ? |
| Cunha et al, 2020         | +                     | ?                                      | +                    | +                          | ?                                | !            | + |
| Daly et al, 2005          | ?                     | ⊖                                      | ?                    | +                          | ?                                | ⊖            | ⊖ |
| Deus et al, 2021          | +                     | +                                      | +                    | +                          | ?                                | !            | + |
| Fragala et al, 2014       | ?                     | ?                                      | +                    | +                          | ?                                | !            | ? |
| Hofmann et al, 2016       | ?                     | ⊖                                      | ?                    | +                          | ?                                | ⊖            | ⊖ |
| Hvid et al, 2017          | ?                     | ⊖                                      | +                    | +                          | +                                | ⊖            | ⊖ |
| Nunes et al, 2019         | ?                     | +                                      | +                    | +                          | ?                                | !            | ? |
| Orsatti et al, 2008       | ?                     | +                                      | +                    | +                          | ?                                | !            | ? |
| Parkhouse et al, 2010     | ⊖                     | ?                                      | +                    | +                          | ?                                | ⊖            | ⊖ |
| Pyka et al, 1994          | ?                     | ?                                      | +                    | +                          | ?                                | !            | ? |
| Ruiz et al, 2015          | ?                     | +                                      | +                    | +                          | ?                                | !            | ? |
| Sartorio et al, 2001      | ?                     | ?                                      | +                    | +                          | ?                                | !            | ? |
| So et al, 2013            | ?                     | ⊖                                      | +                    | +                          | ?                                | ⊖            | ⊖ |
| Son et al, 2020           | ?                     | +                                      | +                    | +                          | ?                                | !            | ? |
| Tomelari et al, 2020      | ?                     | ⊖                                      | +                    | +                          | ?                                | ⊖            | ⊖ |
| Tsai et al, 2015          | ?                     | ?                                      | ⊖                    | +                          | ?                                | !            | ? |
| Urzi et al, 2019          | ?                     | ⊖                                      | ?                    | +                          | ?                                | ⊖            | ⊖ |
| Vale et al, 2017          | ?                     | ⊖                                      | +                    | +                          | ?                                | ⊖            | ⊖ |
| Vale et al, 2014          | ?                     | ⊖                                      | +                    | ?                          | ?                                | ⊖            | ⊖ |
| Valkeinen et al, 2005     | ?                     | +                                      | +                    | +                          | ?                                | !            | ? |

Supplementary Figure 2. Risk of Bias (RoB 2.0).

# SUPPLEMENTARY DATA

**A** IGF-1

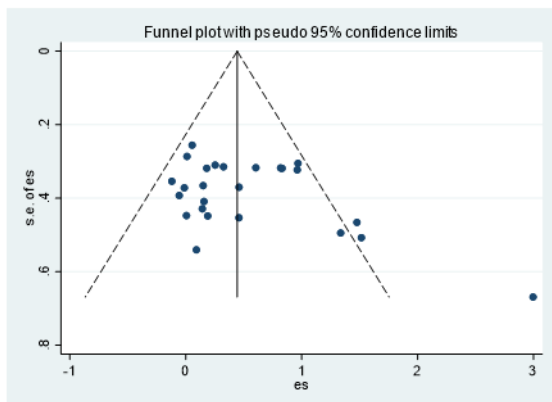

**B** BDNF

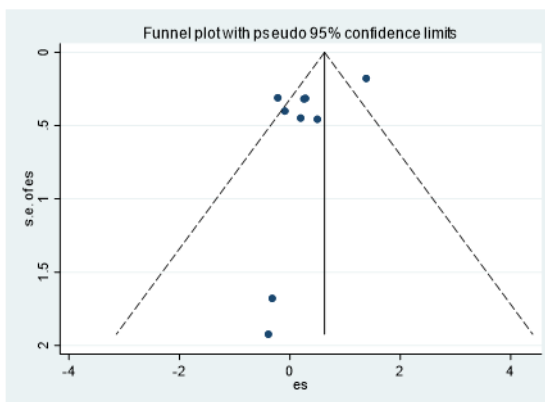

**Supplementary Figure 3.** Funnel plot with 95% pseudo confidence limits for: A. IGF-1; B. BDNF.
